# Supplementary material
Source: publisher site journal article supplement (https://www.dovepress.com/get_supplementary_file.php?f=253349.docx)
Supplement: Supplementary file 1 [file get_supplementary_file.php]

**Table S1** Screening DEGs in ovarian cancer by RRA method

| DEGs | Gene symbols |
| --- | --- |
| Up-regulated | SOX17 SCGB2A1 C8orf4 FOLR1 CD24 ST6GALNAC1 FZD10 MMP7 MAL CEP55 LYPD1 TTK FAM83D S100A2 DLGAP5 MECOM C1orf106 FOXQ1 CP KLHL14 EPCAM BUB1B PSAT1 GLDC PTH2R MELK PTX3 SST CKS2 LYPD6B MEOX1 WFDC2 DEFB1 CLDN10 KIF4A CENPK KLK6 PRC1 KIF20A NEK2 E2F8 CDCA5 CLDN3 CENPF MCM2 TRIP13 EHF PBK NCAPG AIF1L SCGB1D2 ESRP1 DTL MTHFD2 LEMD1 CTHRC1 PLAG1 CCNB1 SOX9 LOC101928554 RAD51AP1 TOP2A ZWINT ASRGL1 UBE2C RGS1 LOC102659288 NUSAP1 GPR160 RACGAP1 GINS1 ISG15 SLC39A4 EPHX4 VTCN1 CDK1 UHRF1 KIF11 XKR4 KIF15 EYA2 LGR6 XK CXXC5 DUXAP10 NDC80 DCDC2 TNNT1 LPAR3 KRT23 KLK7 PFKP EZH2 STIL PRAME C12orf56 TFAP2A PROM1 STON2 INHBB ERV3-2 SYNE4 PSRC1 PANK1 SLC25A33 |
| Down-regulated | ITLN1 BCHE MGARP OGN SERTM1 TCEAL2 MNDA CHRDL1 MUM1L1 PRG4 SPOCK1 TMEM255A DFNA5 BNC1 EFEMP1 PROCR TCEAL7 NPY1R RARRES1 NAP1L3 RNF128 ADH1B GADL1 SYT4 NELL2 AOX1 SBSPON PKHD1L1 HAND2-AS1 PRSS35 FGF13 AQP9 CALB2 REEP1 CLEC4M PCOLCE2 ADH1C CHGB GPR133 DPP10 KDR CAV1 GHR DOCK11 HBB OLFML1 PTPRZ1 GPRASP1 CRNDE AADACL2 SFRP1 BAMBI PDGFD PRKAR2B VGLL3 CFH NDN PCDH17 RTN1 FLRT3 TFPI2 MEIS2 LHX2 ABCA8 PAPSS2 PDE8B CADPS2 GPM6A C2orf40 GIPC2 SEL1L2 BEX1 DIRAS3 ARHGAP18 CSGALNACT1 TSPAN8 IGFBP6 WNT2B LRRN4 TNFSF13B OMD GFPT2 HSPA2 LINC01105 ZFPM2 LGALS2 UPK3B CXCL6 TMEM98 WNT5A GNAI1 ATP10D SCG5 LOC100996760 MST4 PCDH9 FZD7 GAS1 PTGIS PPM1K ALDH1A1 GNG11 PEG3 LRP2 NDNF CLDN15 TCF21 KCNT2 HSD17B2 ARMCX1 SLC31A2 METTL25 ABI3BP NAP1L2 PLSCR4 CNRIP1 GATA6 LINC01279 SDPR ARX PGR PPAP2A PROS1 MGC24103 PKD2 HAS1 DSC3 |

**Abbreviation:** RRA, Robust Rank Aggregation.

**Table S2** GO and KEGG analysis of up-regulated genes associated with ovarian cancer

| Term | Description | Count | *P*-value |
| --- | --- | --- | --- |
| **Up-regulated** |  |  |  |
| GO:0051301 | Cell division | 14 | 4.97E-08 |
| GO:0030496 | Midbody | 9 | 4.32E-07 |
| GO:0007052 | Mitotic spindle organization | 6 | 5.36E-07 |
| GO:0007067 | Mitotic nuclear division | 11 | 9.28E-07 |
| GO:0005876 | Spindle microtubule | 6 | 3.55E-06 |
| GO:0005819 | Spindle | 8 | 3.74E-06 |
| GO:0008283 | Cell proliferation | 12 | 4.52E-06 |
| GO:0000281 | Mitotic cytokinesis | 5 | 1.73E-05 |
| GO:0008017 | Microtubule binding | 9 | 2.09E-05 |
| GO:0000776 | Kinetochore | 6 | 7.17E-05 |
| KEGG: hsa04110 | Cell cycle | 5 | 0.002447 |

If there were more than ten terms enriched in this category, top ten terms were selected according to *P*-value. Count: the number of enriched genes in each term.

**Abbreviation:** GO, Gene Ontology; KEGG, Kyoto Encyclopedia of Genes and Genomes.

**Table S3** GO and KEGG analysis of down-regulated genes associated in ovarian cancer

| Term | Description | Count | *P*-value |
| --- | --- | --- | --- |
| **Down-regulated** |  |  |  |
| GO:0005576 | extracellular region | 30 | 1.61E-07 |
| GO:0005578 | proteinaceous extracellular matrix | 12 | 1.04E-06 |
| GO:0007596 | blood coagulation | 10 | 2.10E-06 |
| GO:0005109 | frizzled binding | 5 | 6.14E-05 |
| GO:0008201 | heparin binding | 7 | 0.000398 |
| GO:0050805 | negative regulation of synaptic transmission | 3 | 7.82E-04 |
| GO:0005615 | extracellular space | 19 | 0.001908 |
| GO:0006069 | ethanol oxidation | 3 | 0.002408 |
| GO:0030514 | negative regulation of BMP signaling pathway | 4 | 0.002711 |
| GO:0045165 | cell fate commitment | 4 | 0.002888 |
| KEGG: hsa00830 | Retinol metabolism | 4 | 0.005938 |
| KEGG: hsa04310 | Wnt signaling pathway | 5 | 0.008099 |
| KEGG: hsa00350 | Tyrosine metabolism | 3 | 0.017381 |
| KEGG: hsa04916 | Melanogenesis | 4 | 0.019963 |
| KEGG: hsa05205 | Proteoglycans in cancer | 5 | 0.02801 |
| KEGG: hsa05217 | Basal cell carcinoma | 3 | 0.039012 |

**Abbreviation:** BMP, bone morphogenetic protein; Wnt, Wingless/Integrated.


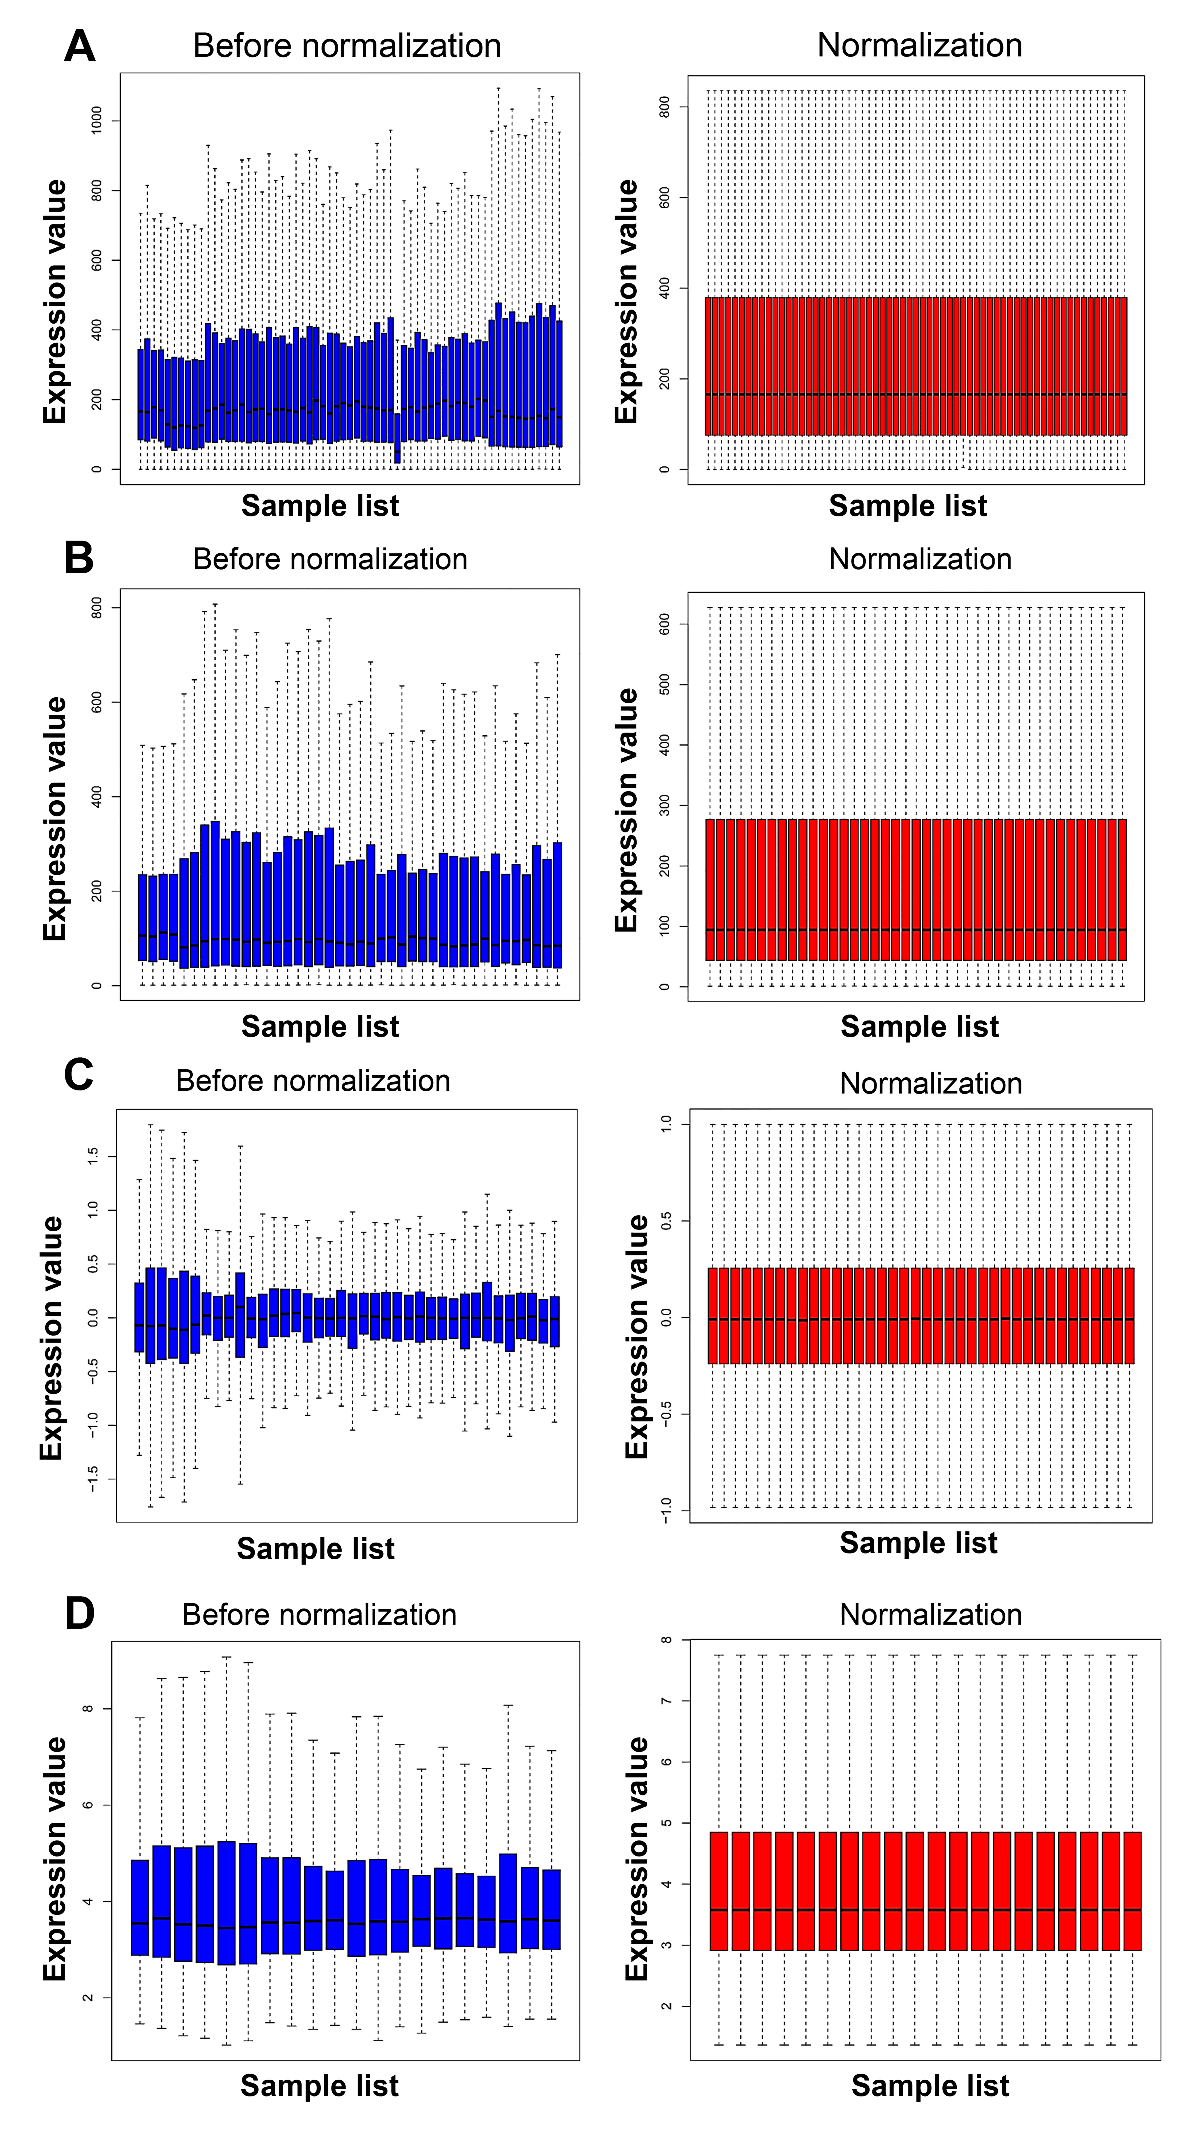


**Figure S1** Standardization of gene expression.

**Notes:** (A) Standardization of GSE18520 dataset. (B) Standardization of GSE27651 dataset. (C) Standardization of GSE40595 dataset. (D) Standardization of GSE52037 dataset. The blue and red bar represents data before normalization and after normalization, respectively.


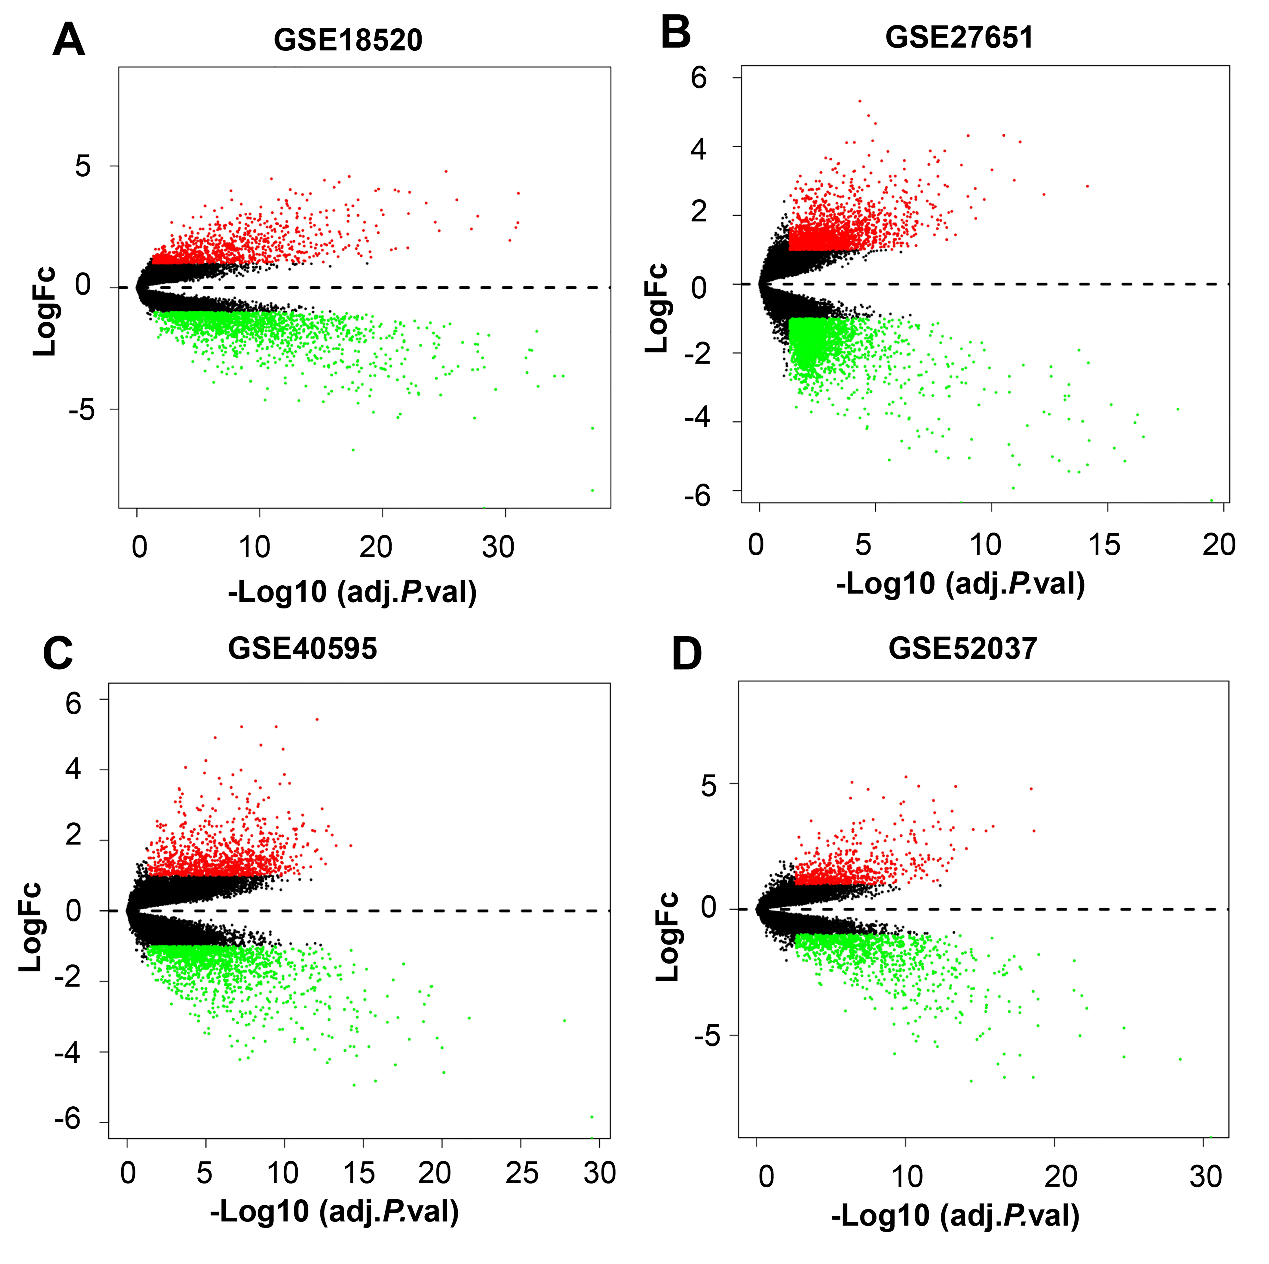


**Figure S2** Differential expression of data between two sets of samples.

**Notes:** (A) GSE18520 dataset, (B) GSE27651 dataset, (C) GSE40595 dataset, and (D) GSE52037 dataset. The red and green points represent up and downregulated DEGs respectively. The black points represent no significant difference genes.

**Abbreviations:** FC, fold change.


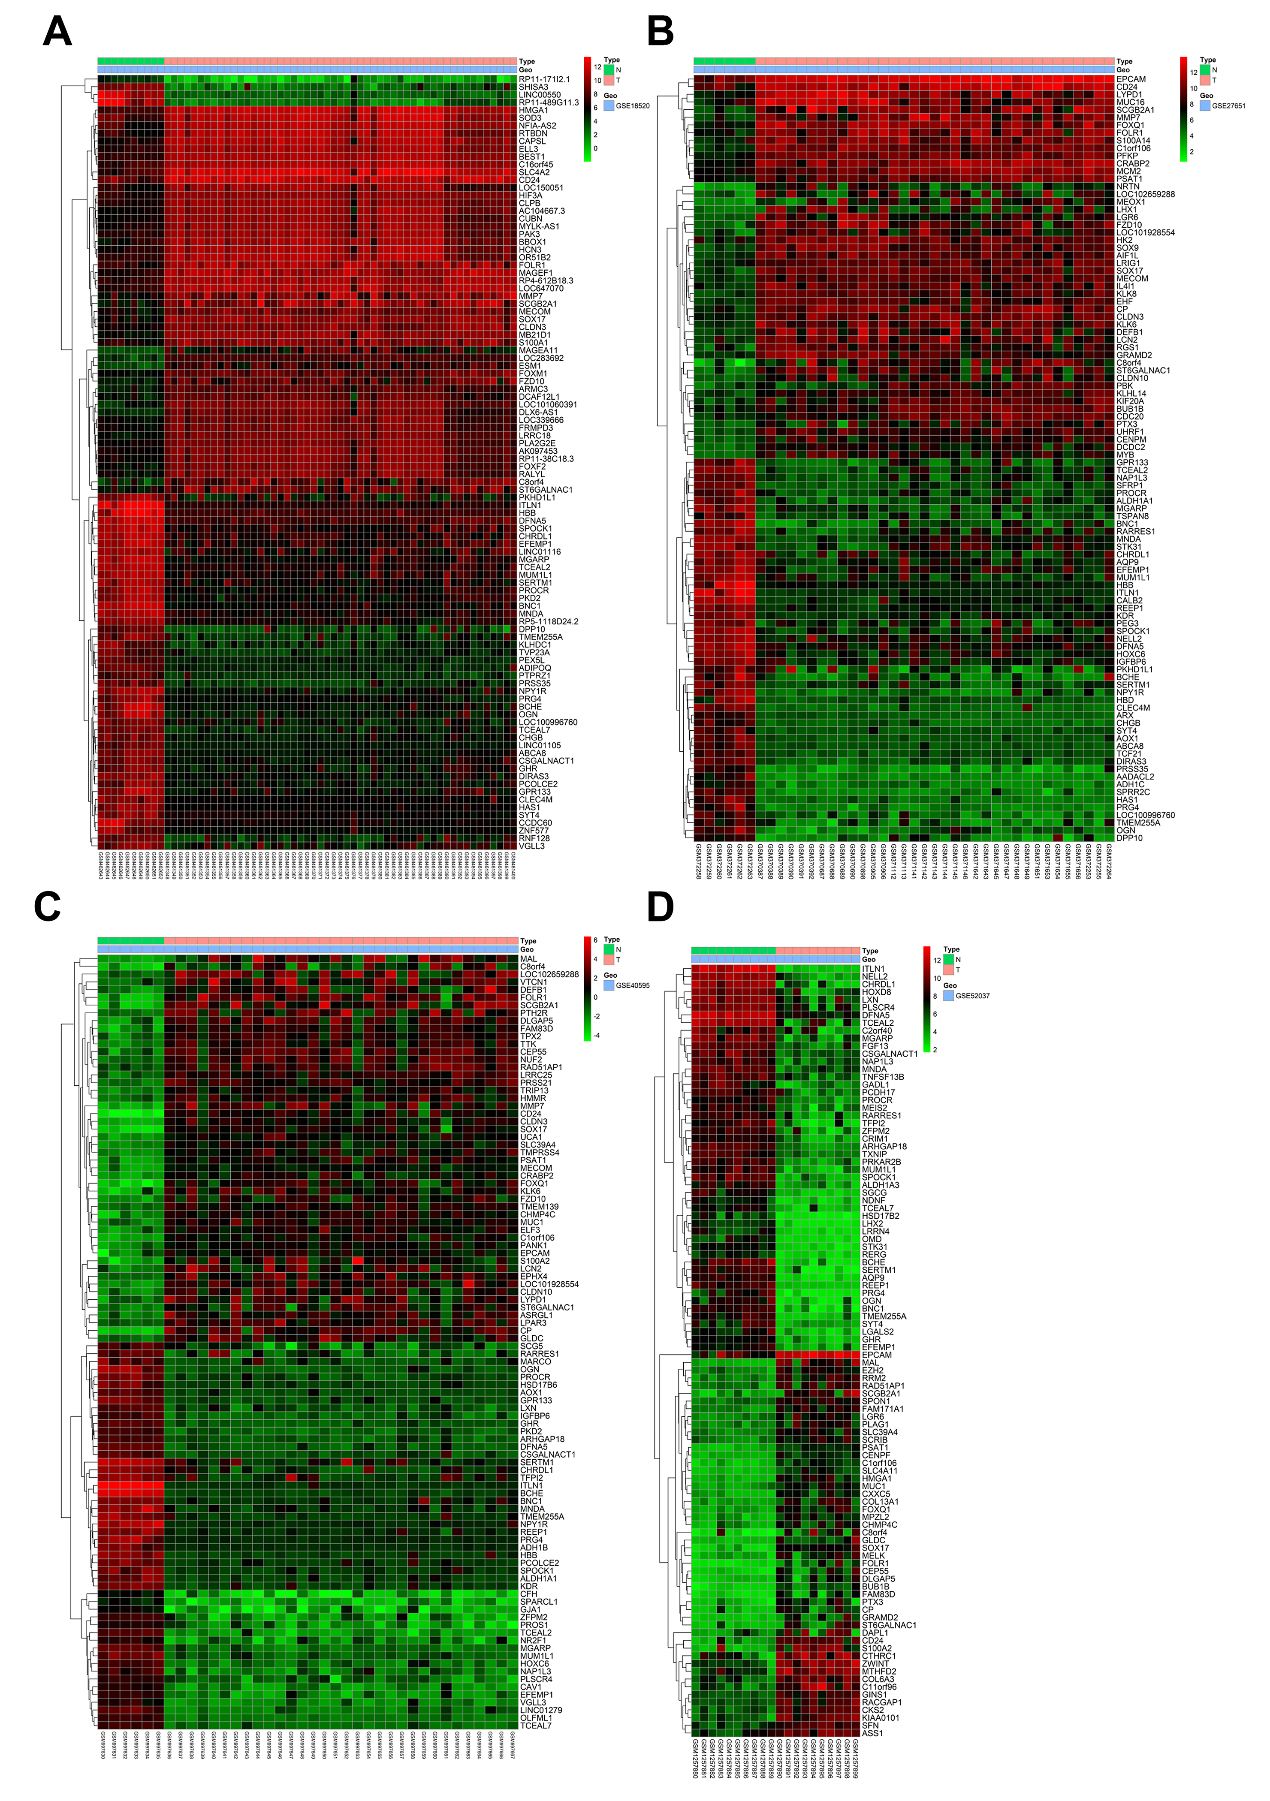


**Figure S3** Differential expression of data between two sets of samples.

**Notes:** (A) GSE18520 dataset, (B) GSE27651 dataset, (C) GSE40595 dataset, and (D) GSE52037 dataset. The red and green points represent up and downregulated DEGs respectively. The black points represent no significant difference genes.
